# Supplementary material for: Ultrasonic, spectrophotometric and theoretical studies of sigma and PI interactions of iodine with substituted benzene
Source: Royal Society of Chemistry journal article supplement (doi:10.1039/c5ra03297k), 2015-01-01
Supplement: c5ra03297k1.pdf [file c5ra03297k1.pdf]

## Supporting information

### **ULTRASONIC, SPECTROPHOTOMETRIC AND DFT INVESTIGATION ON HALOGEN BONDED AND I<sub>2</sub>···π INTERACTION OF PHENOL···I<sub>2</sub>, ANISOLE···I<sub>2</sub> AND CHLOROBENZENE···I<sub>2</sub>**

*A. Justin AdaikalaBaskar<sup>a</sup>, R. Kumar<sup>b</sup>, R. Vijay Solomon<sup>c</sup>, Mahesh Sundararajan<sup>d\*</sup>, V. Kannappan<sup>e,\*</sup>, D. RoopSingh<sup>e</sup>, M. Jaccob<sup>a,\*</sup>*

<sup>a</sup>Department of Chemistry, Loyola College, Chennai 600 034, India

<sup>b</sup>Department of Physics, The New College, Chennai 600 014, India

<sup>c</sup>Department of Chemical Engineering, University of South Carolina, Columbia, USA

<sup>d</sup>Theoretical Chemistry Section, Bhabha Atomic Research Centre, Mumbai 400 085, India

<sup>e</sup>Department of Chemistry, Presidency College, Chennai 600 005, India

\*To whom correspondence should be addressed: madhavanjack05@gmail.com

#### **Contents**

Page 2. Fig. S1. Recorded UV - visible spectra for 1, 2 and 3 with iodine in n-hexane medium at 303K.

Page 3. Table S2. Cartesian coordinates of all the geometries under investigation.

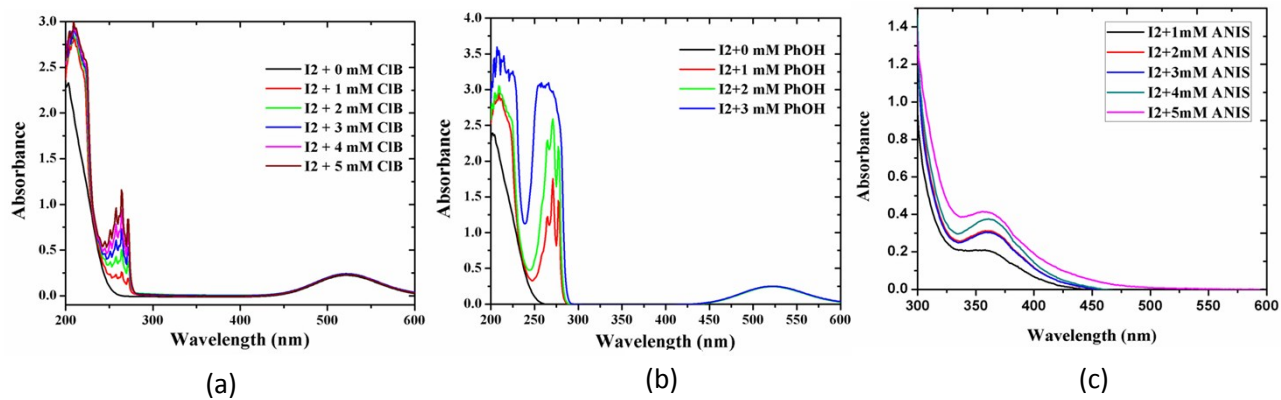

**Figure S1.** Recorded UV - visible spectra for chlorobenzene, phenol and anisole with iodine in n-hexane medium at 303K. The concentration of acceptor iodine was kept constant at  $2 \times 10^{-5}$  M and the concentration of donor varied in excess.

Table S2. Calculated Cartesian coordinates of all the compounds in the present study.

|        |              |              |              |               |              |              |              |
|--------|--------------|--------------|--------------|---------------|--------------|--------------|--------------|
| Iodine |              |              |              | Chlorobenzene |              |              |              |
| 53     | 0.541132000  | 0.246914000  | 0.000000000  | 6             | 1.573788000  | 1.208351000  | 0.000000000  |
| 53     | -2.151749000 | 0.246914000  | 0.000000000  | 6             | 0.177161000  | 1.217007000  | 0.000000000  |
|        |              |              |              | 6             | -0.507029000 | 0.000000000  | 0.000000000  |
|        |              |              |              | 6             | 0.177161000  | -1.217008000 | 0.000000000  |
|        |              |              |              | 6             | 1.573788000  | -1.208350000 | 0.000000000  |
|        |              |              |              | 6             | 2.275084000  | 0.000000000  | 0.000000000  |
|        |              |              |              | 1             | 2.113838000  | 2.156206000  | 0.000000000  |
|        |              |              |              | 1             | -0.379729000 | 2.153312000  | 0.000000000  |
|        |              |              |              | 1             | -0.379729000 | -2.153313000 | 0.000000000  |
|        |              |              |              | 1             | 2.113838000  | -2.156205000 | 0.000000000  |
|        |              |              |              | 1             | 3.365805000  | -0.000001000 | 0.000000000  |
|        |              |              |              | 17            | -2.254472000 | 0.000000000  | 0.000000000  |
| Phenol |              |              |              | Anisole       |              |              |              |
| 6      | -1.202834000 | -1.168360000 | 0.000000000  | 6             | 0.004001000  | 0.000811000  | -0.017929000 |
| 6      | 0.189875000  | -1.232142000 | 0.000000000  | 6             | 1.402146000  | 0.004522000  | -0.084347000 |
| 6      | 0.935363000  | -0.046930000 | 0.000000000  | 6             | 2.088212000  | 1.226804000  | -0.085483000 |
| 6      | 0.283384000  | 1.192457000  | 0.000000000  | 6             | 1.370380000  | 2.431836000  | -0.020388000 |
| 6      | -1.112124000 | 1.242146000  | 0.000000000  | 6             | -0.018907000 | 2.410114000  | 0.045371000  |
| 6      | -1.863051000 | 0.064800000  | 0.000000000  | 6             | -0.713688000 | 1.193913000  | 0.047629000  |
| 1      | -1.778595000 | -2.095072000 | 0.000000000  | 1             | -0.523298000 | -0.954660000 | -0.017282000 |
| 1      | 0.715330000  | -2.187322000 | 0.000000000  | 1             | 1.941224000  | -0.940354000 | -0.134277000 |
| 1      | 0.868143000  | 2.116432000  | 0.000001000  | 1             | 1.925822000  | 3.370219000  | -0.022135000 |
| 1      | -1.612654000 | 2.211598000  | 0.000000000  | 1             | -0.566460000 | 3.352564000  | 0.097010000  |
| 1      | -2.952565000 | 0.107107000  | -0.000001000 | 1             | -1.802803000 | 1.180613000  | 0.100523000  |
| 8      | 2.303993000  | -0.159730000 | 0.000001000  | 8             | 3.450955000  | 1.349496000  | -0.146598000 |
| 1      | 2.687433000  | 0.735144000  | -0.000002000 | 6             | 4.216025000  | 0.148375000  | -0.204174000 |
|        |              |              |              | 1             | 4.050740000  | -0.477623000 | 0.688833000  |
|        |              |              |              | 1             | 3.979391000  | -0.438801000 | -1.107612000 |
|        |              |              |              | 1             | 5.264812000  | 0.463479000  | -0.239904000 |
| 1a     |              |              |              | 1b            |              |              |              |
| 6      | 3.221005000  | -0.152944000 | -1.217950000 | 6             | 4.182683000  | 1.332249000  | -1.184470000 |
| 6      | 2.500081000  | -1.345613000 | -1.210336000 | 6             | 3.611370000  | 0.058289000  | -1.140867000 |
| 6      | 2.124464000  | -1.943617000 | 0.004020000  | 6             | 3.053714000  | -0.380551000 | 0.058040000  |
| 6      | 2.481256000  | -1.330373000 | 1.216552000  | 6             | 3.044686000  | 0.411445000  | 1.204853000  |
| 6      | 3.202331000  | -0.137536000 | 1.220658000  | 6             | 3.619181000  | 1.682282000  | 1.142131000  |
| 6      | 3.564309000  | 0.440186000  | 0.000487000  | 6             | 4.187211000  | 2.144457000  | -0.047883000 |
| 1      | 3.512658000  | 0.321425000  | -2.153951000 | 1             | 4.621440000  | 1.688810000  | -2.116761000 |
| 1      | 2.227931000  | -1.815430000 | -2.155781000 | 1             | 3.593167000  | -0.583387000 | -2.020604000 |
| 1      | 1.616489000  | -2.908116000 | 0.006045000  | 1             | 2.588947000  | 0.041810000  | 2.122026000  |
| 1      | 2.194113000  | -1.788668000 | 2.163388000  | 1             | 3.616009000  | 2.313742000  | 2.031127000  |
| 1      | 3.478858000  | 0.348305000  | 2.155149000  | 1             | 4.629000000  | 3.140135000  | -0.090587000 |
| 53     | -0.525766000 | -0.559403000 | 0.001635000  | 53            | -0.555110000 | -0.699083000 | 0.010144000  |
| 53     | -3.085202000 | 0.555532000  | -0.002600000 | 53            | -3.002265000 | 0.612599000  | -0.050444000 |
| 17     | 4.458269000  | 1.933352000  | -0.002606000 | 17            | 2.311720000  | -1.970968000 | 0.118817000  |

2a

|    |              |              |              |
|----|--------------|--------------|--------------|
| 6  | 3.717904000  | -0.956013000 | 1.274942000  |
| 6  | 3.507439000  | 0.419327000  | 1.230193000  |
| 6  | 3.013076000  | 1.005607000  | 0.057761000  |
| 6  | 2.724308000  | 0.199758000  | -1.062596000 |
| 6  | 2.946644000  | -1.187645000 | -0.997459000 |
| 6  | 3.438448000  | -1.768537000 | 0.167605000  |
| 1  | 4.100421000  | -1.404277000 | 2.192723000  |
| 1  | 3.714957000  | 1.055682000  | 2.089980000  |
| 1  | 2.404875000  | 0.662439000  | -1.999375000 |
| 1  | 2.723003000  | -1.801206000 | -1.870595000 |
| 1  | 3.601613000  | -2.844580000 | 0.218574000  |
| 8  | 2.837868000  | 2.357111000  | 0.052038000  |
| 1  | 2.403478000  | 2.619847000  | -0.779686000 |
| 53 | -0.140699000 | -0.039025000 | -0.300662000 |
| 53 | -2.835494000 | -0.025499000 | 0.219707000  |

2b

|    |              |              |             |
|----|--------------|--------------|-------------|
| 6  | 4.109353000  | 1.778110000  | 0.000001000 |
| 6  | 3.016941000  | 0.911351000  | 0.000001000 |
| 6  | 3.240191000  | -0.467821000 | 0.000000000 |
| 6  | 4.540541000  | -0.980391000 | 0.000000000 |
| 6  | 5.624835000  | -0.100016000 | 0.000000000 |
| 6  | 5.416037000  | 1.280582000  | 0.000000000 |
| 1  | 3.933545000  | 2.854467000  | 0.000001000 |
| 1  | 1.993375000  | 1.287304000  | 0.000001000 |
| 1  | 4.705710000  | -2.060891000 | 0.000000000 |
| 1  | 6.638924000  | -0.501717000 | 0.000000000 |
| 1  | 6.265284000  | 1.964310000  | 0.000000000 |
| 8  | 2.133915000  | -1.295781000 | 0.000000000 |
| 1  | 2.416874000  | -2.226976000 | 0.000000000 |
| 53 | -0.588411000 | -0.481642000 | 0.000000000 |
| 53 | -3.160879000 | 0.378224000  | 0.000000000 |

3a

|    |              |              |              |
|----|--------------|--------------|--------------|
| 6  | -3.286948000 | -0.412527000 | 1.366443000  |
| 6  | -3.338635000 | -1.767393000 | 1.070327000  |
| 6  | -3.056517000 | -2.237077000 | -0.223172000 |
| 6  | -2.714002000 | -1.329383000 | -1.214782000 |
| 6  | -2.643349000 | 0.051847000  | -0.938551000 |
| 6  | -2.949264000 | 0.512229000  | 0.362299000  |
| 1  | -3.504635000 | -0.037203000 | 2.366388000  |
| 1  | -3.601634000 | -2.474113000 | 1.858467000  |
| 1  | -3.099941000 | -3.303328000 | -0.442704000 |
| 1  | -2.486691000 | -1.674546000 | -2.224119000 |
| 1  | -2.458823000 | 0.753790000  | -1.749538000 |
| 53 | 0.218141000  | 0.008566000  | -0.308014000 |
| 53 | 2.980773000  | -0.057716000 | 0.208751000  |
| 8  | -2.952452000 | 1.817836000  | 0.730597000  |
| 6  | -2.569395000 | 2.790111000  | -0.248061000 |
| 1  | -1.545462000 | 2.599457000  | -0.606474000 |
| 1  | -2.606903000 | 3.756075000  | 0.265315000  |
| 1  | -3.270106000 | 2.795281000  | -1.098238000 |

3b

|    |              |              |              |
|----|--------------|--------------|--------------|
| 6  | 4.622533000  | -0.692969000 | 1.184355000  |
| 6  | 3.768597000  | 0.384867000  | 0.921076000  |
| 6  | 2.933035000  | 0.329622000  | -0.197230000 |
| 6  | 2.943843000  | -0.785297000 | -1.043673000 |
| 6  | 3.797194000  | -1.848858000 | -0.766390000 |
| 6  | 4.641344000  | -1.809491000 | 0.350082000  |
| 1  | 5.273381000  | -0.652361000 | 2.058887000  |
| 1  | 3.763058000  | 1.244004000  | 1.588586000  |
| 1  | 2.276897000  | -0.799450000 | -1.905795000 |
| 1  | 3.801996000  | -2.716262000 | -1.427491000 |
| 1  | 5.306655000  | -2.645961000 | 0.565115000  |
| 8  | 2.046863000  | 1.335047000  | -0.548065000 |
| 53 | -0.510691000 | 0.410835000  | -0.257174000 |
| 53 | -3.109020000 | -0.457402000 | 0.226086000  |
| 6  | 2.090896000  | 2.550622000  | 0.214906000  |
| 1  | 1.359329000  | 3.217449000  | -0.252307000 |
| 1  | 3.095672000  | 2.995507000  | 0.162712000  |
| 1  | 1.808142000  | 2.373755000  | 1.263768000  |
